# Supplementary material for: Nut intake and stroke risk: A dose-response meta-analysis of prospective cohort studies
Source: PubMed Central journal article supplement (PMC4965766; doi:10.1038/srep30394), 2016-07-29
Supplement: srep30394-s1.pdf [file srep30394-s1.pdf]

## Nut intake and stroke risk: A dose-response meta-analysis of prospective cohort studies

Chuan Shao, Hui Tang, Wei Zhao, Jianquan He

**Supplementary Table I Database search strategy and results**

| Queries in PubMed |                                 |             |           | Queries in Embase |                                                                    |             |           |
|-------------------|---------------------------------|-------------|-----------|-------------------|--------------------------------------------------------------------|-------------|-----------|
| Search            | Query                           | Items found | Date      | Search            | Query                                                              | Items found | Date      |
| #14               | Search #5 AND #9 AND #13        | 4396        | 2016/2/14 | #14               | Search #5 AND #9 AND #13                                           | 9745        | 2016/2/14 |
| #13               | Search #10 #11 OR #12           | 1866877     | 2016/2/14 | #13               | Search #10 #11 OR #12                                              | 2606133     | 2016/2/14 |
| #12               | Search risk assessment          | 336131      | 2016/2/14 | #12               | Search 'risk assessment'/de OR 'risk assessment'                   | 397066      | 2016/2/14 |
| #11               | Search risk factors             | 969445      | 2016/2/14 | #11               | Search 'risk factors'/de OR 'risk factors'                         | 865784      | 2016/2/14 |
| #10               | Search risk                     | 1866876     | 2016/2/14 | #10               | Search 'risk'/de OR 'risk'                                         | 2606133     | 2016/2/14 |
| #9                | Search #6 OR #7 OR #8           | 519603      | 2016/2/14 | #9                | Search #6 OR #7 OR #8                                              | 682212      | 2016/2/14 |
| #8                | Search lifestyle                | 119318      | 2016/2/14 | #8                | Search 'lifestyle'/de OR 'lifestyle'                               | 139640      | 2016/2/14 |
| #7                | Search diet                     | 414016      | 2016/2/14 | #7                | Search 'diet'/de OR 'diet'                                         | 564329      | 2016/2/14 |
| #6                | Search nut                      | 7945        | 2016/2/14 | #6                | Search 'nut'/de OR 'nut'                                           | 13764       | 2016/2/14 |
| #5                | Search #1 OR #2 OR #3 OR # 4    | 426474      | 2016/2/14 | #5                | Search #1 OR #2 OR #3 OR # 4                                       | 403749      | 2016/2/14 |
| #4                | Search cerebrovascular accident | 246433      | 2016/2/14 | #4                | Search 'cerebrovascular accident'/de OR 'cerebrovascular accident' | 236641      | 2016/2/14 |
| #3                | Search cerebrovascular disorder | 306112      | 2016/2/14 | #3                | Search 'cerebrovascular disorder'/de OR 'cerebrovascular disorder' | 51874       | 2016/2/14 |
| #2                | Search cerebrovascular diseases | 312454      | 2016/2/14 | #2                | Search 'cerebrovascular diseases'                                  | 21966       | 2016/2/14 |
| #1                | Search stroke                   | 243924      | 2016/2/14 | #1                | Search 'stroke'/de OR 'stroke'                                     | 362947      | 2016/2/14 |

---

**Supplementary Table II Reasons for study exclusion.**

---

**News, letters, comments, reviews, meta-analysis, or conference abstract.**

---

1. Zhao M, Liu W. Nut consumption decreases risk of some diseases. *Am J Clin Nutr.* 2014;100(3):982.
  2. Addala S, Banerjee S, Ames D. Lifestyle habits and risk of stroke. Audit of medical notes may provide direction. *BMJ.* 2009;338:b1310
  3. Cheng TO. Influence of dietary patterns on stroke risk in China. *Stroke.* 2005;36(2):228.
  4. Ros E. Nuts and cardiovascular disease. *Ann Nutr Metab.* 2013;62:3.
  5. Zhang Z, Xu G, Wei Y, Zhu W, Liu X. Nut consumption and risk of stroke. *Eur J Epidemiol.* 2015 Mar;30(3):189-96.
  6. Zhou D, Yu H, He F, Reilly KH, Zhang J, Li S, Zhang T, Wang B, Ding Y, Xi B. Nut consumption in relation to cardiovascular disease risk and type 2 diabetes: a systematic review and meta-analysis of prospective studies. *Am J Clin Nutr.* 2014;100(1):270-7.
  7. Afshin A, Micha R, Khatibzadeh S, Mozaffarian D. Consumption of nuts and beans and risk of incident coronary heart disease, stroke, and diabetes mellitus: A systematic review and meta-analysis. *Circulation* 2013;127.
  8. Djousse L, Petrone A, Gaziano J. Nut consumption is associated with a lower risk of death among us male physicians. *Circulation* 2014;129: AP067.
  9. Afshin A, Micha R, Khatibzadeh S, Mozaffarian D. Consumption of nuts and legumes and risk of incident ischemic heart disease, stroke, and diabetes: a systematic review and meta-analysis. *Am J Clin Nutr.* 2014;100(1):278-88.
  10. Luo C, Zhang Y, Ding Y, Shan Z, Chen S, Yu M, Hu FB, Liu L. Nut consumption and risk of type 2 diabetes, cardiovascular disease, and all-cause mortality: a systematic review and meta-analysis. *Am J Clin Nutr.* 2014;100(1):256-69.
  11. Grosso G, Yang J, Marventano S, Micek A, Galvano F, Kales SN. Nut consumption on all-cause, cardiovascular, and cancer mortality risk: a systematic review and meta-analysis of epidemiologic studies. *Am J Clin Nutr.* 2015;101(4):783-93.
  12. Mayhew AJ, de Souza RJ, Meyre D, Anand SS, Mente A. A systematic review and meta-analysis of nut consumption and incident risk of CVD and all-cause mortality. *Br J Nutr.* 2016;115(2):212-25.
  13. Nus M, Ruperto M, Sánchez-Muniz FJ. Nuts, cardio and cerebrovascular risks. A Spanish perspective. *Arch Latinoam Nutr.* 2004;54(2):137-48.
  14. Ros E. Nuts and CVD. *Br J Nutr.* 2015;113 Suppl 2:S111-20.
  15. Boden-Albala B, Sacco RL. Lifestyle factors and stroke risk: exercise, alcohol, diet, obesity, smoking, drug use, and stress. *Curr Atheroscler Rep.* 2000;2(2):160-6.
  16. Boden-Albala B, Southwick L, Carman H. Dietary interventions to lower the risk of stroke. *Curr Neurol Neurosci Rep.* 2015;15(4):15.
  17. Kivipelto, M. Lifestyle related factors in stroke and dementia. *J Neurol Sci.* 2009;283: 242-243
-

- 
18. Hankey GJ. Risk factor management to prevent stroke. *Adv Neurol.* 2003;92:179-85.
  19. Petrović G. Risk factors for development of cerebrovascular stroke. *Med Pregl.* 2000;53(3-4):207-14.
  20. Jia Q, Liu L, Wang Y. Risk factors and prevention of stroke in the Chinese population. *J Stroke Cerebrovasc Dis.* 2011;20(5):395-400.
  21. Sacco RL. Risk factors, outcomes, and stroke subtypes for ischemic stroke. *Neurology.* 1997;49(5 Suppl 4):S39-44.
  22. Srinath Reddy K, Katan MB. Diet, nutrition and the prevention of hypertension and cardiovascular diseases. *Public Health Nutr.* 2004;7(1A):167-86.
  23. Zhang Y, Hu G. Dietary Pattern, Lifestyle Factors, and Cardiovascular Diseases. *Current nutrition reports.* 2012;1:64-72.
  24. [No authors listed]. Lifestyle modifications help reduce stroke risk. *Harv Health Lett.* 2015;40(3):8.
  25. [No authors listed]. Reduce your risk of silent strokes. Exercise, eat a healthy diet, and manage blood pressure and cholesterol to lower your odds. *Harv Health Lett.* 2015;40(5):3.
  26. Bertke KA, Keyserling T. Dietary habits and foods consumed in the stroke belt. *J Am Geriatr Soc.* 2013;61:S226.
- 

#### **Reporting data about dietary patterns or no data about nut consumption**

---

27. Kagan A, Popper JS, Rhoads GG, Yano K. Dietary and other risk factors for stroke in Hawaiian Japanese men. *Stroke.* 1985;16(3):390-6.
28. Bernhardt R, Feng Z, Wang Z, Deng Y, Schettler G. Risk factors for atherosclerotic vascular diseases in the People's Republic of China. *Monogr Atheroscler.* 1986;14:35-9.
29. Dalmeijer GW, Struijk EA, van der Schouw YT, Soedamah-Muthu SS, Verschuren WM, Boer JM, Geleijnse JM, Beulens JW. Dairy intake and coronary heart disease or stroke--a population-based cohort study. *Int J Cardiol.* 2013;167(3):925-9.
30. Kondo I, Ojima T, Nakamura M, Hayasaka S, Hozawa A, Saitoh S, Ohnishi H, Akasaka H, Hayakawa T, Murakami Y, Okuda N, Miura K, Okayama A, Ueshima H; NIPPON DATA80 Research Group. Consumption of dairy products and death from cardiovascular disease in the Japanese general population: the NIPPON DATA80. *J Epidemiol.* 2013;23(1):47-54.
31. Kurth T, Moore SC, Gaziano JM, Kase CS, Stampfer MJ, Berger K, Buring JE. Healthy lifestyle and the risk of stroke in women. *Arch Intern Med.* 2006;166(13):1403-9.
32. Fung TT, Stampfer MJ, Manson JE, Rexrode KM, Willett WC, Hu FB. Prospective study of major dietary patterns and stroke risk in women. *Stroke.* 2004;35(9):2014-9.
33. Hlebowicz J, Persson M, Gullberg B, Sonestedt E, Wallström P, Drake I, Nilsson J, Hedblad B, Wirfält E. Food patterns, inflammation markers and incidence of cardiovascular disease: the Malmo Diet and Cancer study. *J Intern Med.* 2011;270(4):365-76.
34. Zhang Y, Tuomilehto J, Jousilahti P, Wang Y, Antikainen R, Hu G. Lifestyle factors and antihypertensive treatment on the risks of ischemic and hemorrhagic

- stroke. *Hypertension*. 2012;60(4):906-12.
35. Larsson SC, Åkesson A, Wolk A. Primary prevention of stroke by a healthy lifestyle in a high-risk group. *Neurology*. 2015;84(22):2224-8
  36. Larsson SC, Akesson A, Wolk A. Overall diet quality and risk of stroke: a prospective cohort study in women. *Atherosclerosis*. 2014;233(1):27-9.
  37. Larsson SC, Akesson A, Wolk A. Healthy diet and lifestyle and risk of stroke in a prospective cohort of women. *Neurology*. 2014;83(19):1699-704.
  38. Larsson SC, Virtamo J, Wolk A. Dairy consumption and risk of stroke in Swedish women and men. *Stroke*. 2012;43(7):1775-80.
  39. Larsson SC, Virtamo J, Wolk A. Dietary protein intake and risk of stroke in women. *Atherosclerosis*. 2012;224(1):247-51.
  40. Yamori Y, Kihara M, Fujikawa J, Soh Y, Nara Y, Ohtaka M, Horie R, Tsunematsu T, Note S, Fukase M. Dietary risk factors of stroke and hypertension in Japan -- Part 1: Methodological assessment of urinalysis for dietary salt and protein intakes. *Jpn Circ J*. 1982;46(9):933-8.
  41. Yamori Y, Kihara M, Fujikawa J, Soh Y, Nara Y, Ohtaka M, Horie R, Tsunematsu T, Note S, Kukase M. Dietary risk factors of stroke and hypertension in Japan -- Part 2: Validity of urinalysis for dietary salt and protein intakes under a field condition. *Jpn Circ J*. 1982;46(9):939-43.
  42. Pashiri MT, Koh WP, Pan A. Dairy intake and risk of cardiovascular mortality in Singapore Chinese adults. *Circulation* 2015;132: SUPPL. 3.
  43. Sonestedt E, Wirfält E, Wallström P, Gullberg B, Orho-Melander M, Hedblad B. Dairy products and its association with incidence of cardiovascular disease: the Malmö diet and cancer cohort. *Eur J Epidemiol*. 2011;26(8):609-18.
  44. Wallström P, Sonestedt E, Hlebowicz J, Ericson U, Drake I, Persson M, Gullberg B, Hedblad B, Wirfält E. Dietary fiber and saturated fat intake associations with cardiovascular disease differ by sex in the Malmö Diet and Cancer Cohort: a prospective study. *PLoS One*. 2012;7(2):e31637.
  45. Lin PH, Yeh WT, Svetkey LP, Chuang SY, Chang YC, Wang C, Pan WH. Dietary intakes consistent with the DASH dietary pattern reduce blood pressure increase with age and risk for stroke in a Chinese population. *Asia Pac J Clin Nutr*. 2013;22(3):482-91.
  46. Lindenstrøm E, Boysen G, Nyboe J. Lifestyle factors and risk of cerebrovascular disease in women. The Copenhagen City Heart Study. *Stroke*. 1993;24(10):1468-72.
  47. Lindenstrøm E, Boysen G, Nyboe J. Risk factors for stroke in Copenhagen, Denmark. II. Life-style factors. *Neuroepidemiology*. 1993;12(1):43-50.
  48. Meng L, Maskarinec G, Lee J, Kolonel LN. Lifestyle factors and chronic diseases: application of a composite risk index. *Prev Med*. 1999;29(4):296-304.
  49. Zhang Y, Tuomilehto J, Jousilahti P, Wang Y, Antikainen R, Hu G. Lifestyle factors on the risks of ischemic and hemorrhagic stroke. *Arch Intern Med*. 2011 14;171(20):1811-8.
  50. Zhang Y, Tuomilehto J, Jousilahti P, Wang Y, Antikainen R, Hu G. Lifestyle factors and antihypertensive treatment on the risks of ischemic and hemorrhagic stroke. *Hypertension*. 2012;60(4):906-12.
  51. Estruch R, Ros E, Salas-Salvadó J, Covas MI, Corella D, Arós F, Gómez-Gracia E, Ruiz-Gutiérrez V, Fiol M, Lapetra J, Lamuela-Raventós RM, Serra-Majem L,
-

Pintó X, Basora J, Muñoz MA, Sorlí JV, Martínez JA, Martínez-González MA; PREDIMED Study Investigators. Primary prevention of cardiovascular disease with a Mediterranean diet. *N Engl J Med*. 2013;368(14):1279-90.

---

**Shorter follow-up than others on the same cohort**

52. He K, Merchant A, Rimm EB, Rosner BA, Stampfer MJ, Willett WC, Ascherio A. Dietary fat intake and risk of stroke in male US healthcare professionals: 14 year prospective cohort study. *BMJ*. 2003 Oct 4;327(7418):777-82.
  53. Bernstein AM, Pan A, Rexrode KM, Stampfer M, Hu FB, Mozaffarian D, Willett WC. Dietary protein sources and the risk of stroke in men and women. *Stroke*. 2012 Mar;43(3):637-44.
-

**Supplementary Table III General characteristic of included studies.**

| References                    | Country         | Study name                                                                         | Sex | Age at baseline    | Follow-up, year | No. of cases | No. of participants | Stroke diagnosed                               | Exposure (Ht vs. Lt)                          | RR(95% CI)                                                                                                                  | Adjusted or matched variables                                                                                                                                                                                                                                                                                                                                                                                                                                   |
|-------------------------------|-----------------|------------------------------------------------------------------------------------|-----|--------------------|-----------------|--------------|---------------------|------------------------------------------------|-----------------------------------------------|-----------------------------------------------------------------------------------------------------------------------------|-----------------------------------------------------------------------------------------------------------------------------------------------------------------------------------------------------------------------------------------------------------------------------------------------------------------------------------------------------------------------------------------------------------------------------------------------------------------|
| Yochum et al., 2000 [6]       | United States   | Iowa Women's Health Study                                                          | F   | 55-69              | 11              | 215          | 34,492              | ICD-9 430-438                                  | >4 times/month vs. <0                         | 0.73(0.41-1.29)                                                                                                             | Age, total energy intake, BMI, WHR, HBP, diabetes, alcohol intake, education, E(P)RT, marital status, smoking, physical activity, intakes of cholesterol, saturated fat, fish, vitamin C, carotenoids, dietary fiber, and whole grains                                                                                                                                                                                                                          |
| Djoussé et al., 2010 [8]      | United States   | The Physicians' Health Study I                                                     | M   | 40.7-86.7          | 21.1            | 1,424        | 21,078              | Medical records                                | 7 times/week vs. 0                            | 1.07(0.79-1.46)                                                                                                             | Age, aspirin assignment, BMI, HBP, diabetes, alcohol intake, education, smoking, physical activity, atrial fibrillation, coronary heart disease, dairy consumption, breakfast cereal, red meat, fish, fruit and vegetable intake.                                                                                                                                                                                                                               |
| Yaemsiri et al., 2012 [10]    | United States   | The Women's Health Initiative Observational Study                                  | F   | 50-79              | 8               | 1049         | 87,025              | Medical records                                | 1 medium servings/d vs. 0                     | 0.89 (0.66-1.20)                                                                                                            | Age, race, education, family income, smoking, hormone replacement therapy use, total metabolic equivalent task hours per week, alcohol intake, history of coronary heart disease, history of atrial fibrillation, history of diabetes, aspirin use, use of antihypertensive medication, use of cholesterol-lowering medication, BMI, systolic blood pressure, total energy intake, dietary vitamin E, fruits and vegetable intake, and fiber                    |
| Bao et al., 2013 [12]         | United States   | The Nurses' Health Study                                                           | F   | 30-55              | 30              | 873          | 76,464              | ICD- 9 430-438                                 | ≥5 servings/week vs. 0                        | 1.05 (0.73-1.52)                                                                                                            | Age, race, BMI, physical activity, smoking, alcohol consumption, physical examination for screening purposes, multivitamin use, current aspirin use, family history of diabetes mellitus, family history of myocardial infarction, family history of cancer, history of diabetes mellitus, history of hypertension, history of hypercholesterolemia, intake of total energy, red/processed meat, fruits, and vegetables, and menopausal status and hormone use. |
| Bao et al., 2013 [12]         | United States   | The Health Professionals Follow-Up Study                                           | M   | 40-75              | 24              | 687          | 42,498              | ICD-9 430-438                                  | ≥5 servings/week vs. 0                        | 0.78 (0.58-1.06)                                                                                                            | Age, race, BMI, physical activity, smoking, alcohol consumption, physical examination for screening purposes, multivitamin use, current aspirin use, family history of diabetes mellitus, family history of myocardial infarction, family history of cancer, history of diabetes mellitus, history of hypertension, history of hypercholesterolemia, intake of total energy, red/processed meat, fruits, and vegetables.                                        |
| Haring et al., 2015 [13]      | United States   | The Atherosclerosis Risk in Communities Study                                      | M,F | 45-64              | 22.7            | 699          | 11601               | Medical records                                | 1 serving/d vs. 0                             | 1.00(0.77-1.31)                                                                                                             | Age, sex, race, study center, total energy intake, smoking, education, HBP, use of antihypertensive medication, high density lipoprotein cholesterol, total cholesterol, use of lipid lowering medication, BMI, WHR, alcohol intake, physical activity, carbohydrate intake, fiber intake, fat intake, and magnesium intake                                                                                                                                     |
| Gopinath et al., 2015 [14]    | Australia       | The Blue Mountains Eye Study                                                       | M,F | >49                | 15              | 430          | 2893                | ICD-9 and 10 Revision                          | Tertile 3 vs. Tertile 1                       | 0.88(0.60-1.29)                                                                                                             | Age, sex, qualifications, total diet score, BMI, smoking, alcohol intake, self-rated health, walking disability, HBP, diabetes, doctor-diagnosed history of cancer, angina, stroke and/or acute myocardial infarction.                                                                                                                                                                                                                                          |
| Hshieh et al., 2015 [15]      | United States   | The Physicians' Health Study (PHS) I and II                                        | M   | 66.6±9.3           | 9.6             | 14           | 20,742              | Medical records                                | ≥5 servings/week vs. <1 serving/month         | 0.64(0.32-1.30)                                                                                                             | Age, BMI, alcohol intake, smoking, exercise, calories, saturated fat consumption, fruit/vegetable consumption, red meat consumption, prevalent diabetes, and hypertension.                                                                                                                                                                                                                                                                                      |
| Bonaccio et al., 2015 [16]    | Italy           | The Moli-sani study                                                                | M,F | --                 | 4.3             | 19           | 19,386              | ICD-9 430-438                                  | Nut intake vs. no intake                      | 1.01(0.37-2.76)                                                                                                             | Age, sex, education, smoking, physical activity, BMI, energy intake, Mediterranean diet score without nuts, C-reactive protein platelet count, and the neutrophil to lymphocyte ratio.                                                                                                                                                                                                                                                                          |
| Luu et al., 2015 [17]         | United States   | The Southern Community Cohort Study,                                               | M,F | 40-79              | 5.4             | 217          | 71,764              | ICD-10 I61-64                                  | Q5 vs. Q1                                     | African-IS: 0.89 (0.45-1.74), African-HS: 1.37(0.67-2.80);<br>European-IS: 0.47(0.12-1.76);<br>European-HS: 0.62(0.12-3.26) | Age, sex, education, occupation, household income, marital status, smoking, alcohol intake, BMI, physical activity, vitamin supplement use, Charlson Comorbidity Index, metabolic conditions, total energy intake, red meat intake, chicken intake, seafood intake, vegetable intake, and fruit intake.                                                                                                                                                         |
| Luu et al., 2015[17]          | China           | The Shanghai Women's Health Study                                                  | F   | 40-70              | 12.2            | 706          | 74,741              | ICD-9 430-435                                  | Q5 vs. Q1                                     | IS:0.72(0.51-1.03);<br>HS:0.77 (0.55-1.07)                                                                                  | Age, education, occupation, household income (SMHS) or income per capita (SWHS), smoking status, alcohol intake, BMI, physical activity, regular tea consumption, Charles comorbidity index, metabolic conditions, total energy intake, red meat intakes, chicken/duck intake, seafood intake, vegetable intake, and fruit intake.                                                                                                                              |
| Luu et al., 2015 [17]         | China           | The Shanghai Men's Health Study                                                    | M   | 40-74              | 6.5             | 479          | 61,480              | ICD-9 430-435                                  | Q5 vs. Q1                                     | IS:0.79(0.54-1.14);<br>HS:0.80 (0.55-1.16)                                                                                  | Age, education, occupation, household income (SMHS) or income per capita (SWHS), smoking status, alcohol intake, BMI, physical activity, regular tea consumption, Charles comorbidity index, metabolic conditions, total energy intake, red meat intakes, chicken/duck intake, seafood intake, vegetable intake, and fruit intake.                                                                                                                              |
| den Brandt et al., 2015[18]   | The Netherlands | The Cohort Study                                                                   | M,F | 55-69              | 10              | 565          | 120,852             | ICD-9 430-438                                  | > 10g vs. 0                                   | 0.76(0.56-1.02)                                                                                                             | Age, sex, smoking, history of physician-diagnosed hypertension, diabetes, body height, BMI, non-occupational physical activity, education, alcohol intake, vegetables and fruit, energy, use of nutritional supplements, and postmenopausal HRT (women).                                                                                                                                                                                                        |
| Di Giuseppe et al., 2015 [19] | German          | The European Prospective Investigation into the Cancer and Nutrition Potsdam Study | M,F | F: 49.2<br>M: 52.5 | 8.3             | 288          | 26,285              | ICD-10 I63, ICD-10 I60, ICD-10 I61, ICD-10 I64 | > 1 portion per week vs. 1/2 portion per week | 1.37(0.92-2.05)                                                                                                             | Age, sex, BMI, waist circumference, prevalent hypertension, hyperlipidemia, diabetes, smoking, educational attainment and sport activity, alcohol intake, red meat, whole-grain breads, fruit, vegetable, fish, cakes and cookies, confectionary, fried potatoes, other beverages and total energy.                                                                                                                                                             |

**HS, hemorrhagic strokes; IS, ischemic strokes; M, male; F, female; Ht, highest; Lt, lowest; HRT, hormone replacement therapy, ERT, estrogen replacement therapy, SMHS, Shanghai Men's Health Study; SWHS, Shanghai Women's Health Study.**

**Supplementary Table IV** Assessment of bias risk of include studies

| Study                         | Selection                                |                                   |                           |                                                   | Comparability <sup>1</sup> | Outcome                                           |                       |                                                          | Total quality scores |
|-------------------------------|------------------------------------------|-----------------------------------|---------------------------|---------------------------------------------------|----------------------------|---------------------------------------------------|-----------------------|----------------------------------------------------------|----------------------|
|                               | Representativeness of the exposed cohort | Selection of the unexposed cohort | Ascertainment of exposure | Outcome of interest not present at start of study |                            | Control for important factor or additional factor | Assessment of outcome | Follow-up long enough for outcomes to occur <sup>2</sup> |                      |
| Yochum et al., 2000 [6]       | ☆                                        | ☆                                 | ☆                         | ☆                                                 | ☆                          | ☆                                                 | ☆                     | ☆                                                        | 8                    |
| Djouss éet al., 2010 [8]      | -                                        | ☆                                 | ☆                         | ☆                                                 | ☆                          | ☆                                                 | ☆                     | ☆                                                        | 7                    |
| Yaemsiri et al., 2012 [10]    | ☆                                        | ☆                                 | ☆                         | ☆                                                 | ☆                          | ☆                                                 | -                     | ☆                                                        | 7                    |
| Bao et al., 2013 [12] NHS     | -                                        | ☆                                 | ☆                         | ☆                                                 | ☆                          | ☆                                                 | ☆                     | ☆                                                        | 7                    |
| Bao et al., 2013 [12] HPFS    | -                                        | ☆                                 | ☆                         | ☆                                                 | ☆                          | ☆                                                 | ☆                     | ☆                                                        | 7                    |
| Haring et al., 2015 [13]      | ☆                                        | ☆                                 | ☆                         | ☆                                                 | ☆                          | ☆                                                 | ☆                     | ☆                                                        | 8                    |
| Gopinath et al., 2015[14]     | ☆                                        | ☆                                 | ☆                         | ☆                                                 | ☆                          | ☆                                                 | ☆                     | ☆                                                        | 8                    |
| Hshieh et al., 2015 [15]      | -                                        | ☆                                 | ☆                         | ☆                                                 | ☆                          | ☆                                                 | -                     | ☆                                                        | 6                    |
| Bonaccio et al., 2015 [16]    | ☆                                        | ☆                                 | ☆                         | ☆                                                 | ☆                          | ☆                                                 | -                     | ☆                                                        | 7                    |
| Luu et al., 2015 [17] SCCH    | ☆                                        | ☆                                 | ☆                         | ☆                                                 | ☆                          | ☆                                                 | -                     | ☆                                                        | 7                    |
| Luu et al., 2015[17] SWHS     | ☆                                        | ☆                                 | ☆                         | ☆                                                 | ☆                          | ☆                                                 | ☆                     | ☆                                                        | 8                    |
| Luu et al., 2015[17] SMHS     | ☆                                        | ☆                                 | ☆                         | ☆                                                 | ☆                          | ☆                                                 | -                     | ☆                                                        | 7                    |
| den Brandt et al., 2015[18]   | ☆                                        | ☆                                 | ☆                         | ☆                                                 | ☆                          | ☆                                                 | ☆                     | ☆                                                        | 8                    |
| Di Giuseppe et al., 2015 [19] | ☆                                        | ☆                                 | ☆                         | ☆                                                 | ☆                          | ☆                                                 | -                     | ☆                                                        | 7                    |

<sup>1</sup> According to the Newcastle-Ottawa Scale guideline, a maximum of two stars can be assigned for comparability. However, we adopted the guideline with some modification in present meta-analysis. Since confounder is the major concern in observational studies, no more than one star could be assigned. When the included studies provided risk estimates adjusted for more than ten covariates, one star could be assigned. Otherwise, no star could be assigned.

<sup>2</sup> One star could be assigned to a cohort study if they were followed up for ten follow-up years or more.

<sup>3</sup> A cohort study with a follow-up rate > 75% was given one star

**Supplementary Table V Results of sensitivity analysis**

| Study excluded                    | Summary RR (95% CI) | Heterogeneity |                |
|-----------------------------------|---------------------|---------------|----------------|
|                                   |                     | P             | I <sup>2</sup> |
| Yochum et al., 2000 [6]           | 0.89(0.81-0.98)     | 0.486         | 0%             |
| Djouss é et al., 2010 [8]         | 0.87(0.79-0.96)     | 0.581         | 0%             |
| Yaemsiri et al., 2012 [10]        | 0.88(0.80-0.97)     | 0.453         | 0%             |
| Bao et al., 2013 [12]             | 0.88(0.80-0.97)     | 0.453         | 0%             |
| Haring et al., 2015 [13]          | 0.87(0.79-0.96)     | 0.526         | 0%             |
| Gopinath et al., 2015 [14]        | 0.88(0.80-0.97)     | 0.453         | 0%             |
| Hshieh et al., 2015 [15]          | 0.89(0.81-0.98)     | 0.516         | 0%             |
| Bonaccio et al., 2015 [16]        | 0.88(0.80-0.97)     | 0.458         | 0%             |
| Luu et al., 2015 African-IS [17]  | 0.88(0.80-0.97)     | 0.453         | 0%             |
| Luu et al., 2015 African-HS [17]  | 0.88(0.80-0.96)     | 0.567         | 0%             |
| Luu et al., 2015 European-IS [17] | 0.89(0.81-0.97)     | 0.518         | 0%             |
| Luu et al., 2015 European-HS [17] | 0.88(0.81-0.97)     | 0.466         | 0%             |
| Luu et al., 2015 Asia-IS [17]     | 0.90(0.82-1.00)     | 0.552         | 0%             |
| Luu et al., 2015 Asia-HS [17]     | 0.90(0.82-1.00)     | 0.557         | 0%             |
| Brandt et al., 2015 [18]          | 0.90(0.81-0.99)     | 0.535         | 0%             |
| Di Giuseppe et al., 2015 [19]     | 0.86(0.78-0.95)     | 0.826         | 0%             |



**Supplementary Table VI The quality of evidence based on GRADE system.**

| Exposure   | Quality assessment |              |              |                                 |              |             |                  |                        |          | Quality |
|------------|--------------------|--------------|--------------|---------------------------------|--------------|-------------|------------------|------------------------|----------|---------|
|            | No. of studies     | Design       | Risk of bias | Inconsistency                   | Indirectness | Imprecision | Publication bias | Other considerations   |          |         |
| Nut intake | 11                 | Cohort study | Not serious  | No serious (I <sup>2</sup> =0%) | No serious   | No serious  | undetected       | dose response gradient | moderate |         |

**Supplementary Table VII Comparison with Previous Meta-analyses**

|                                                 | Afshin et al. 2014 [2]                                            | Shi et al. 2014                                                                | Zhou et al. 2014 [20]                                                        | Zhang et al. 2015 [21]                                                                              | Mayhew et al. 2016 [3]                                              | The present study                                                   |
|-------------------------------------------------|-------------------------------------------------------------------|--------------------------------------------------------------------------------|------------------------------------------------------------------------------|-----------------------------------------------------------------------------------------------------|---------------------------------------------------------------------|---------------------------------------------------------------------|
| Number of studies (References)                  | 4 (7-9, 12)                                                       | 3 (6, 8, 9)                                                                    | 3 (6, 8, 9)                                                                  | 6 (6-10, 12)                                                                                        | 6 (9, 10, 12, 17-19)                                                | 11 (6, 8, 10, 12-19)                                                |
| Search date updated                             | December 25, 2013                                                 | January 31, 2014                                                               | October 10, 2013                                                             | June 2014                                                                                           | July 2015                                                           | February 14, 2016                                                   |
| Study Quality                                   |                                                                   |                                                                                |                                                                              |                                                                                                     |                                                                     |                                                                     |
| Main finding (H vs. L) RR with 95% CI           | NR                                                                | 0.90(0.81-0.99)                                                                | 0.87(0.74-1.03)                                                              | Total stroke: 0.90(0.83-0.98);<br>Stroke mortality: 0.86(0.69-1.06)                                 | Total stroke: 1.05(0.95-1.61);<br>Stroke mortality: 0.83(0.69-1.00) | Total stroke: 0.88(0.80-0.97);<br>Stroke mortality: 0.81(0.72-0.91) |
| Dose-response analysis: linear or nonlinearity? | Linear or nonlinearity? 0.89(0.74-1.05) for per 4 weekly servings | NR                                                                             | Linear association without significance; 0.90(0.71-1.14) for one serving/day | Linear association without significance; 0.94(0.82-1.08) for one serving/day                        | Linear or nonlinearity?; 0.85(0.55- 1.31) for per 4 weekly servings | Nonlinearity; 0.86(0.79-0.94) for 12 grams of nut per day.          |
| Subgroup analysis                               | Stroke subtypes                                                   | Gender, location, time of follow-up, outcome, number of cases, and adjustments | NR                                                                           | Gender, location, stroke subtypes, time of follow-up, Sample size, publication year, Quality score. | NR                                                                  | gender, location, stroke subtypes, and time of follow-up            |
| Sensitivity analyses                            | NR                                                                | NR                                                                             | NR                                                                           | Applied                                                                                             | NR                                                                  | Applied                                                             |
| Publication bias                                | Detected                                                          | Undetected                                                                     | Undetected                                                                   | Undetected                                                                                          | NR                                                                  | Undetected                                                          |
| Power analysis                                  | NR                                                                | NR                                                                             | NR                                                                           | NR                                                                                                  | NR                                                                  | Report (86.2%)                                                      |
| GRADE used for evidence                         | NR                                                                | NR                                                                             | NR                                                                           | NR                                                                                                  | Low                                                                 | Moderate                                                            |

**NR: not report.**

Shi, Z.Q. et al. Consumption of nuts and legumes and risk of stroke: a meta-analysis of prospective cohort studies. *Nutr Metab Cardiovasc Dis* **24**, 1262-71 (2014).

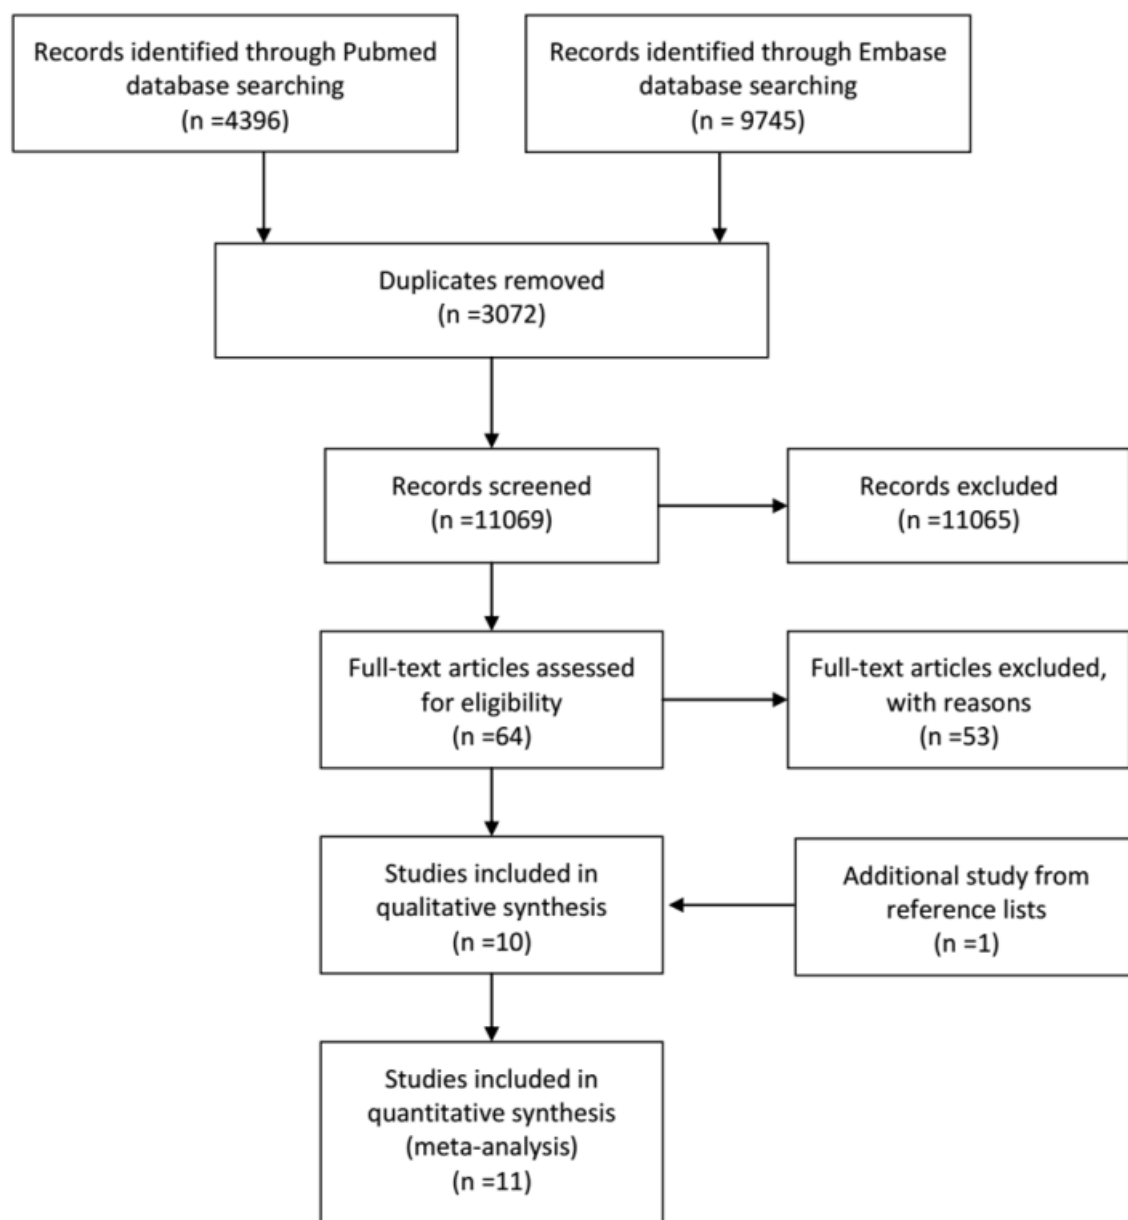

Supplementary Figure I Flow Diagram

## Supplementary Appendix 1 SAS code for Power Calculations

Power calculations: The methodology used is described by Cafri 2009<sup>[341]</sup> and corresponding macro was obtained from the Supplementary Material in Cafri 2009<sup>[34]</sup>. The macro used and results are below:

❖❖ Power calculation for meta-analysis of nut ❖❖

```
data nut;
input es v;
cards;
-0.3147 0.0504
0.0677 0.0292
-0.1165 0.0190
-0.1165 0.0176
0 0.0190
-0.1278 0.0310
-0.4463 0.0625
0.0100 0.3717
-0.1165 0.1083
0.3148 0.2952
-0.7550 0.1750
-0.4780 0.6416
-0.2614 0.0104
-0.2614 0.0099
-0.2744 0.0138
0.3148 0.0831
;
run;
%metapower(test='M', model='random', raw_data='yes', alpha=.05, tau2=99, heterogeneity=99, n1=99, n2=99, k=99, eff_type='rr', T=-0.127833372, Dataset= nut, B=NA,v=v,
x=NA, es=es, p=NA, weight=NA);

run;
```

```
-----Meta-Analysis Power Macro-----
Test of Mean Effect Size

Model = random
Effect Size Metric = rr
Raw data provided= Yes
Mean Effect Size = -0.127833
Number of Studies = 16
Random Effects Variance= 0
Sampling Variance = 0.0017585
Alpha = 0.05
Estimated Power of Test (One-Tailed) = 1.3443E-6
Estimated Power of Test (Two-Tailed) = 0.8618045
-----
```
